# Supplementary material for: High spatial resolution analysis using automated indentation mapping differentiates biomechanical properties of normal vs. degenerated articular cartilage in mice
Source: eLife journal article supplement (doi:10.7554/elife.74664), 2022-11-29
Supplement: supp [file elife_poa_e74664_Figure_1_figure_supplement_1.docx]

**Supplementary Material**

**
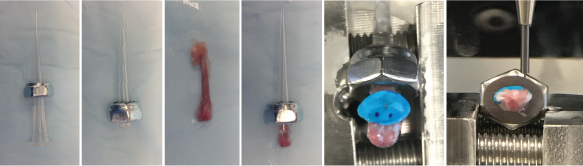
**

**Figure 1 Supplement 1.** Specimen preparation and assemble to sample holder for automated indentation mapping using custom setup, allowing for repositioning of the sample and non-destructive retrieval for 3D XRM imaging.
