# Supplementary material for: High spatial resolution analysis using automated indentation mapping differentiates biomechanical properties of normal vs. degenerated articular cartilage in mice
Source: eLife journal article supplement (doi:10.7554/elife.74664), 2022-11-29
Supplement: supp [file elife_poa_e74664_Figure_2_figure_supplement_1.docx]

**
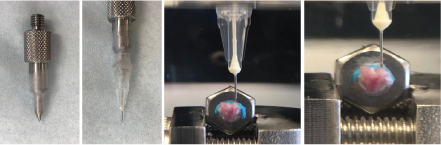
**

**Figure 2 Supplement 1.** Setup for needle probing thickness measurement, using a 30G x 1.4” hypodermic needle (TSK Laboratory, Japan) adapted to the 1 mm spherical indenter (Biomomentum Inc*.*, Laval, QC).
