# Supplementary material for: High spatial resolution analysis using automated indentation mapping differentiates biomechanical properties of normal vs. degenerated articular cartilage in mice
Source: eLife journal article supplement (doi:10.7554/elife.74664), 2022-11-29
Supplement: supp [file elife_poa_e74664_Figure_figure_supplement_2.docx]

**
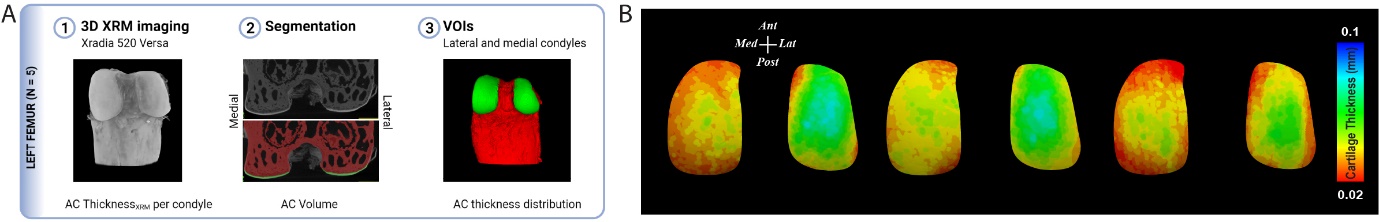
**

**Figure 2 Supplement 2.** 3D PTA-XRM imaging and segmentation protocol of contralateral femoral condyles (*n* = 5) that were not subjected to biomechanical testing (B) Cartilage thickness distribution maps as measured by PTA-XRM imaging for three representative samples. AC: articular cartilage, VOIs: volumes of interest.
